# Supplementary material for: The life history theory of the Lord of the Rings: a randomized controlled trial of using fact versus fiction to teach life history theory
Source: Evolution (N Y). 2022 Feb 16;15(1):2. doi: 10.1186/s12052-022-00160-8 (PMC8850221; doi:10.1186/s12052-022-00160-8)
Supplement: Supplementary file 6 — Additional file 6: Table S2. Linear regression results using the degree to which students like Lord of the Rings (Q9) to predict their answers to the other questions on the survey. [file 12052_2022_160_MOESM6_ESM.xlsx]

## Sheet: Sheet1
Linear regressions using the degree to which students like Lord of the Rings (Q9) to predict their answers to the other questions on the survey
	Q9 fact	Q9 fiction	Coefficient	P-value
Q1 fact			0.19	0.01
Q1 fiction			0.37	5.72e-11
Q2 fact			0.01	0.92
Q2 fiction			-0.01	0.85
Q3 fact			0.16	0.02
Q3 fiction			0.32	1.86e-07
Q4 fact			0.22	0.003
Q4 fiction			0.29	5.75e-07
Q5 fact			0.15	0.06
Q5 fiction			0.26	2.59e-05
Q6 fact			0.19	0.01
Q6 fiction			0.46	2.92e-09
Q7 fact			0.13	0.09
Q7 fiction			0.41	5.85e-08
Q8 fact			1	< 2.2e-16
Q8 fiction			0.84	< 2.2e-16
