# Supplementary material for: The life history theory of the Lord of the Rings: a randomized controlled trial of using fact versus fiction to teach life history theory
Source: Evolution (N Y). 2022 Feb 16;15(1):2. doi: 10.1186/s12052-022-00160-8 (PMC8850221; doi:10.1186/s12052-022-00160-8)
Supplement: Supplementary file 8 — Additional file 8: Table S4. Anonymized individual exam scores for each student in each condition. [file 12052_2022_160_MOESM8_ESM.xls]

## Sheet: survey responses and exam resul
Fact survey responses:														Fiction survey responses:
	Q1(The article was fun)	Q2 (The article was clear and understandable)	Q3 (The article was engaging)	Q4 (The article was memorable)	Q5 (The article was helpful in learning life history theory)	Q6 (The article helped me answer the life history questions on the exam)	Q7 (The article made me interested in the topic of life history)	Q8 (I am familiar with Lord of the Rings stories)	Q9 (I like the Lord of the Rings stories)					Q1(The article was fun)	Q2 (The article was clear and understandable)	Q3 (The article was engaging)	Q4 (The article was memorable)	Q5 (The article was helpful in learning life history theory)	Q6 (The article helped me answer the life history questions on the exam)	Q7 (The article made me interested in the topic of life history)	Q8 (I am familiar with Lord of the Rings stories)	Q9 (I like the Lord of the Rings stories)
	2	4	3	3	1	2	4	3	3					3	3	3	4	2	2	4	5	5
	4	4	4	4	4	2	3	5	5					5	4	5	5	5	5	5	4	4
	3	5	3	4	1	1	1	1	3					4	5	4	3	4	4	4	2	3
	4	3	4	4	3	3	3	4	4					5	4	4	5	4	3	3	5	5
	3	4	4	3	4	2	2	2	3					4	5	4	5	3	2	2	2	4
	3	5	4	2	4	3	2	1	1					4	4	4	3	4	3	5	1	2
	3	4	3	2	4	3	2	1	3					5	5	4	3	4	4	5	3	4
	2	4	4	3	3	2	4	1	1					5	5	4	5	4	4	4	5	4
	2	5	3	2	1	1	4	1	1					4	4	4	4	4	3	2	1	3
	2	2	2	2	2	2	2	4	4					4	3	4	4	3	2	2	2	3
	4	4	4	3	4	3	3	5	4					4	4	4	4	5	2	4	2	3
	3	4	4	3	4	2	3	4	4					5	5	5	5	5	5	5	4	5
	4	4	3	3	4	2	3	1	3					4	4	3	3	4	4	4	1	3
	4	4	4	2	2	2	4	4	4					3	2	4	3	3	2	4	2	1
	3	4	3	3	4	4	4	5	4					4	4	4	4	3	4	4	4	4
	4	4	4	2	4	4	2	1	1					4	4	3	4	4	4	4	4	3
	2	2	3	3	2	2	3	1	3					5	5	5	5	4	4	4	4	4
	3	4	3	2	3	3	3	5	5					4	4	4	4	4	4	4	5	5
	4	3	4	4	4	2	2	3	3					2	4	4	4	4	3	2	1	1
	2	2	2	2	3	3	3	1	1					5	5	5	3	5	5	5	5	1
	3	4	3	3	3	2	4	2	3					5	5	5	5	5	4	4	4	5
	2	1	3	3	2	3	4	4	4					4	4	4	4	4	4	4	2	4
	4	4	4	3	4	4	4	4	4					5	4	5	5	5	5	5	4	4
	3	4	4	4	5	4	3	2	3					4	3	4	4	4	4	3	5	5
	4	4	3	1	4	4	4	2	2					5	4	4	3	4	2	3	1	3
	4	4	4	5	5	3	3	5	5					4	3	4	4	4	3	4	2	3
	1	2	1	2	2	3	2	5	5					5	5	5	4	4	4	4	4	4
	2	2	2	4	4	3	3	5	5					1	1	1	1	1	1	1	1	1
	4	4	3	3	4	3	4	2	3					3	4	3	4	3	1	3	1	3
	5	5	5	1	5	5	5	5	5					4	4	4	5	3	2	2	2	3
	5	5	5	5	5	5	5	5	5					4	5	4	4	4	4	3	2	3
	4	4	4	3	4	4	4	3	3					5	5	5	5	4	3	4	4	4
	5	5	4	4	4	4	4	5	5					5	4	3	4	4	4	3	5	5
	2	4	3	2	4	4	1	5	5					4	3	3	3	3	3	3	3	4
	4	4	3	3	5	4	4	3	4					4	3	4	4	3	3	4	4	4
	3	4	3	3	4	3	3	4	4					4	3	3	4	4	4	4	4	3
	3	4	4	2	4	4	4	4	4					4	4	4	4	4	4	4	2	3
	5	4	4	5	5	5	5	5	5					2	2	3	5	3	2	1	1	1
	4	4	4	3	4	3	4	5	5					4	4	4	4	5	5	4	5	5
	4	4	4	4	4	4	4	4	4					5	4	4	4	4	4	4	5	5
	3	4	3	3	4	4	3	4	4					4	4	5	3	4	3	2	1	1
	2	4	3	3	4	4	3	4	4					5	5	5	5	4	4	5	4	5
	3	4	4	3	4	4	4	4	4					4	4	4	3	4	3	3	4	4
	1	2	2	2	2	2	2	1	1					4	4	4	4	4	4	4	2	3
	4	3	4	2	4	3	4	5	5					4	5	3	5	4	4	3	1	2
	3	5	4	3	4	4	4	4	4					5	5	4	4	4	4	3	2	3
	3	4	2	1	3	2	1	2	3					5	4	4	4	5	4	5	4	2
	4	4	3	3	4	2	4	1	3					4	4	4	4	4	4	4	4	4
	4	5	3	3	5	3	3	3	4					3	4	3	3	4	1	2	3	2
	4	4	5	4	4	3	4	5	5					5	5	4	5	4	4	4	4	4
	3	4	4	3	4	2	3	4	4					3	4	2	3	4	2	1	4	1
	2	5	4	4	4	4	4	2	3					4	4	3	4	3	2	4	1	1
	2	2	3	3	4	2	3	2	2					5	5	5	4	4	4	4	2	3
	4	4	4	3	3	4	3	1	2					5	5	5	5	5	5	5	5	5
	3	4	4	2	4	3	3	2	3					3	3	3	3	3	3	2	2	2
	4	4	4	4	4	4	4	2	3					5	4	4	5	4	4	5	4	4
	4	4	4	3	4	4	3	5	5					2	3	3	4	4	4	1	1	1
	3	4	4	3	5	5	5	1	3					4	4	4	5	4	4	4	4	5
	3	3	3	2	2	3	4	4	4					4	4	4	4	5	4	3	2	3
	1	1	1	1	1	1	1	4	4					4	5	4	4	5	4	3	2	3
	4	4	5	4	4	3	4	5	5					4	4	4	4	4	4	4	2	3
	3	2	3	3	2	2	4	4	3					4	4	4	4	4	3	4	5	5
	5	4	5	4	5	4	5	2	3					5	5	5	5	5	5	5	1	3
	3	5	4	3	4	4	4	4	3					1	4	1	1	1	1	3	4	4
	4	4	2	3	4	2	4	4	4					4	4	4	5	4	4	3	5	5
	2	3	2	3	2	1	2	3	3					5	4	4	4	4	4	4	4	5
	4	4	3	4	4	2	4	4	3					4	4	4	5	5	4	4	4	4
	3	3	3	3	2	2	3	3	3					5	3	4	5	4	4	4	5	5
	3	2	3	2	3	1	3	3	4					5	5	5	5	5	5	5	1	4
	2	4	2	2	4	2	2	5	5					5	5	5	5	5	5	5	4	5
	4	5	4	3	4	5	3	4	4					4	4	4	4	4	3	4	2	3
	4	3	3	2	4	2	3	4	4					5	5	5	5	5	5	5	5	5
	2	4	4	2	3	3	2	1	3					5	5	5	5	5	4	4	4	5
	4	3	3	2	4	2	3	1	1					5	3	4	4	4	4	5	4	4
	4	4	3	2	2	1	3	4	2					5	5	5	5	5	4	5	5	5
	2	3	2	1	3	2	1	5	5					4	4	4	4	4	4	4	2	3
	3	4	4	3	5	2	4	2	3					4	3	3	4	3	1	2	2	3
	3	2	4	3	4	4	5	2	3					5	5	5	5	5	5	4	5	5
	2	4	2	4	4	2	2	1	1					4	4	4	5	4	4	2	5	5
	3	3	3	3	3	3	3	5	5					5	5	5	5	5	5	5	3	3
	2	2	1	1	1	1	1	5	4					5	5	5	4	5	4	4	5	5
	2	4	2	2	3	2	3	4	5					3	3	4	5	3	4	4	2	4
	4	4	4	3	4	3	3	4	5					4	4	3	3	3	2	2	1	3
	1	2	1	1	1	1	1	2	3					5	5	5	5	5	3	4	4	4
	3	5	4	4	4	4	3	5	5					4	4	3	5	4	3	2	4	4
	3	4	3	2	4	3	3	4	4					4	5	5	3	5	4	5	5	5
	3	4	2	2	4	2	3	4	2					5	4	4	4	5	4	5	5	5
	4	3	4	4	3	3	3	5	4					2	4	2	3	4	1	2	1	1
	4	5	4	4	5	4	4	4	4					4	5	4	5	5	1	4	3	3
	1	1	1	1	1	1	1	4	4					5	5	5	5	5	5	5	4	5
	3	4	4	3	4	4	3	5	5					5	5	5	4	4	4	5	2	3
	3	4	4	4	3	3	4	2	3					4	4	4	4	4	2	3	4	3
	4	4	4	3	3	4	3	4	3					5	5	5	5	5	4	5	2	3
	2	3	2	2	2	2	2	4	4					3	2	3	2	2	2	3	1	2
	2	3	2	1	3	2	3	2	2					4	5	5	5	5	5	5	1	3
	3	3	2	1	3	1	2	2	3					4	5	5	4	4	4	4	4	4
	4	4	4	4	4	4	4	5	5					4	4	3	3	4	4	3	2	3
	2	2	3	2	2	1	4	5	5					3	5	4	5	5	5	3	5	5
	2	4	2	2	3	1	2	2	2					4	4	4	4	3	4	3	3	3
	4	5	5	5	5	4	4	5	5					4	4	4	4	4	2	4	1	1
	1	2	2	4	2	2	2	5	5					5	5	5	5	5	5	5	5	5
	2	2	3	2	1	1	2	5	5					4	4	4	4	4	4	2	4	4
	4	3	4	4	4	3	4	3	5					2	3	2	4	2	3	2	2	2
	4	4	4	4	5	4	4	4	5					3	2	2	4	1	1	1	2	1
	2	4	4	2	4	3	3	4	4					4	5	5	5	5	4	4	3	3
	2	3	4	2	2	2	2	1	1					4	4	2	4	4	2	2	4	4
	5	4	5	5	4	4	5	5	5					4	4	2	3	5	1	3	2	3
	2	3	2	3	3	2	2	1	3					4	3	4	4	4	3	3	3	3
	4	4	4	3	5	5	4	1	1					5	5	5	5	5	5	5	5	5
	2	2	2	3	3	2	3	1	1					4	5	4	4	5	5	3	2	3
	2	2	3	2	3	3	2	4	4					5	4	5	4	5	4	4	4	5
	1	1	1	1	4	3	2	1	3					5	4	4	4	4	4	4	5	5
	5	5	5	5	4	4	5	5	5					4	3	4	4	4	4	3	4	3
	2	3	2	2	2	4	2	4	2					4	4	5	4	5	4	4	3	4
														4	4	4	5	5	4	4	4	3
														4	5	4	5	5	5	5	2	5
														4	5	5	5	5	5	5	2	3
														4	5	5	5	5	4	4	4	4
	Mean	3	3.5	3.3	2.8	3.4	2.8	3.1	3.3	3.6				4	4	4	3	4	4	3	4	5
	StDev	1	1	1	1	1	1.1	1	1.5	1.2				4	3	4	3	4	3	3	4	4
	Variance	1.1	1	1	1.1	1.2	1.2	1	2.2	1.5				3	2	2	2	3	1	2	1	1
	n	114	114	114	114	114	114	114	114	114				4	4	4	5	4	4	3	1	3
														5	5	5	5	5	5	5	5	5
														Mean	4.1	4.1	4	4.1	4	3.5	3.6	3.1	3.5
														StDev	0.85	0.85	0.9	0.85	0.88	1.15	1.1	1.43	1.25
														Variance	0.73	0.72	0.81	0.73	0.78	1.33	1.22	2.04	1.56
														n	123	123	123	123	123	123	123	123	123
Exam result
	Traditional	LOTR
Mean	4.92	4.9
Variance	3.03	3.2
Observations	133	131
Pooled Variance	3.18
Hypothesized Mean Difference	0
df	262
t Stat	-0.06
P(T<=t) two-tail	0.95
t Critical two-tail	1.97
